# Supplementary material for: mRNA-1273 COVID-19 vaccine effectiveness against the B.1.1.7 and B.1.351 variants and severe COVID-19 disease in Qatar
Source: Springer Nature journal article supplement (doi:10.1038/s41591-021-01446-y), 2021-07-09
Supplement: 41591_2021_1446_MOESM1_ESM.pdf [file 41591_2021_1446_MOESM1_ESM.pdf]

---

**Supplementary information**

---

**mRNA-1273 COVID-19 vaccine effectiveness against the B.1.1.7 and B.1.351 variants and severe COVID-19 disease in Qatar**

---

In the format provided by the authors and unedited

# Supplementary Material

## Table of Contents

|                                                                                                                                                                                                                             |          |
|-----------------------------------------------------------------------------------------------------------------------------------------------------------------------------------------------------------------------------|----------|
| <b>Supplementary Table 1. Effectiveness of the mRNA-1273 vaccine against SARS-CoV-2 symptomatic infection and against SARS-CoV-2 asymptomatic infection, between February 1-May 10, 2021.....</b>                           | <b>2</b> |
| <b>Supplementary Table 2. Demographic characteristics of the cohort of vaccinated persons who completed at least 14 days after the second vaccine dose and of the comparator cohort of antibody-negative controls .....</b> | <b>3</b> |
| <b>Supplementary Table 3. STROBE checklist of items that should be included in reporting a case-control study .....</b>                                                                                                     | <b>4</b> |

**Supplementary Table 1. Effectiveness of the mRNA-1273 vaccine against SARS-CoV-2 symptomatic infection and against SARS-CoV-2 asymptomatic infection, between February 1-May 10, 2021.**

|                                                                        | ≥14 days after first dose and no second dose |              |                            |              |                                    | ≥14 days after second dose |              |                            |              |                                    |
|------------------------------------------------------------------------|----------------------------------------------|--------------|----------------------------|--------------|------------------------------------|----------------------------|--------------|----------------------------|--------------|------------------------------------|
|                                                                        | Cases<br>(PCR positive)                      |              | Controls<br>(PCR negative) |              | Effectiveness<br>in %<br>(95% CI)* | Cases<br>(PCR positive)    |              | Controls<br>(PCR negative) |              | Effectiveness<br>in %<br>(95% CI)* |
|                                                                        | Vaccinated                                   | Unvaccinated | Vaccinated                 | Unvaccinated |                                    | Vaccinated                 | Unvaccinated | Vaccinated                 | Unvaccinated |                                    |
| <b><i>Effectiveness against symptomatic infection<sup>†</sup></i></b>  |                                              |              |                            |              |                                    |                            |              |                            |              |                                    |
| Any symptomatic infection with SARS-CoV-2                              | 248                                          | 36,944       | 721                        | 36,471       | 66.0<br>(60.6-70.7)                | 1                          | 32,526       | 72                         | 32,455       | 98.6<br>(92.0-100.0)               |
| <b><i>Effectiveness against asymptomatic infection<sup>‡</sup></i></b> |                                              |              |                            |              |                                    |                            |              |                            |              |                                    |
| Any asymptomatic infection with SARS-CoV-2                             | 215                                          | 40,585       | 406                        | 40,394       | 47.3<br>(37.6-55.5)                | 8                          | 37,768       | 107                        | 37,669       | 92.5<br>(84.8-96.9)                |

\*Vaccine effectiveness was estimated using the test-negative, case-control study design.

<sup>†</sup>A symptomatic infection is defined as a PCR-positive test conducted because of clinical suspicion due to presence of symptoms compatible with a respiratory tract infection.

<sup>‡</sup>An asymptomatic infection is defined as a PCR-positive test conducted with no reported presence of symptoms compatible with a respiratory tract infection, that is the PCR testing is done as part of a survey, for pre-travel requirement, or at port of entry into the country.

**Supplementary Table 2. Demographic characteristics of the cohort of vaccinated persons who completed at least 14 days after the second vaccine dose and of the comparator cohort of antibody-negative controls.**

| <b>Characteristics</b>           | <b>Vaccinated persons</b> | <b>Antibody-negative controls</b> |
|----------------------------------|---------------------------|-----------------------------------|
| <b>Median age (IQR)</b> — years  | 40 (31-50)                | 32 (24-42)                        |
| <b>Age group</b> — no. (%)       |                           |                                   |
| <30 years                        | 511 (20.3)                | 30,023 (40.7)                     |
| 30-39 years                      | 745 (29.6)                | 21,502 (29.1)                     |
| 40-49 years                      | 623 (24.7)                | 11,570 (15.7)                     |
| 50-59 years                      | 378 (15.0)                | 6,222 (8.4)                       |
| 60-69 years                      | 109 (4.3)                 | 2,761 (3.7)                       |
| 70+ years                        | 154 (6.1)                 | 1,775 (2.4)                       |
| <b>Sex</b>                       |                           |                                   |
| Male                             | 1,179 (46.8)              | 32,608 (44.2)                     |
| Female                           | 1,341 (53.2)              | 41,245 (55.9)                     |
| <b>Nationality*</b>              |                           |                                   |
| Bangladeshi                      | 77 (3.1)                  | 3,551 (4.8)                       |
| Egyptian                         | 55 (2.2)                  | 5,787 (7.8)                       |
| Filipino                         | 377 (15.0)                | 4,327 (5.9)                       |
| Indian                           | 392 (15.6)                | 11,133 (15.1)                     |
| Nepalese                         | 8 (0.3)                   | 2,573 (3.5)                       |
| Pakistani                        | 82 (3.3)                  | 3,807 (5.2)                       |
| Qatari                           | 1,145 (45.4)              | 17,439 (23.6)                     |
| Sudanese                         | 32 (1.3)                  | 2,980 (4.0)                       |
| Sri Lankan                       | 33 (1.3)                  | 1,995 (2.7)                       |
| Other nationalities <sup>†</sup> | 319 (12.7)                | 20,261 (27.4)                     |

\*Nationalities were chosen to represent the most populous groups in the population of Qatar.

<sup>†</sup>These comprise 32 other nationalities in Qatar among vaccinated persons and 148 other nationalities among antibody-negative controls.

### Supplementary Table 3. STROBE checklist of items that should be included in reporting a case-control study

|                           | Item No | Recommendation                                                                                                                                                                                               | Main text page                                 |
|---------------------------|---------|--------------------------------------------------------------------------------------------------------------------------------------------------------------------------------------------------------------|------------------------------------------------|
| <b>Title and abstract</b> | 1       | (a) Indicate the study's design with a commonly used term in the title or the abstract                                                                                                                       | 2                                              |
|                           |         | (b) Provide in the abstract an informative and balanced summary of what was done and what was found                                                                                                          | 2                                              |
| <b>Introduction</b>       |         |                                                                                                                                                                                                              |                                                |
| Background/rationale      | 2       | Explain the scientific background and rationale for the investigation being reported                                                                                                                         | 3                                              |
| Objectives                | 3       | State specific objectives, including any prespecified hypotheses                                                                                                                                             | 3                                              |
| <b>Methods</b>            |         |                                                                                                                                                                                                              |                                                |
| Study design              | 4       | Present key elements of study design                                                                                                                                                                         | 20-22                                          |
| Setting                   | 5       | Describe the setting, locations, and relevant dates, including periods of recruitment, exposure, follow-up, and data collection                                                                              | 20-22, 24, Extended Data 1-4                   |
| Participants              | 6       | (a) Give the eligibility criteria, and the sources and methods of case ascertainment and control selection. Give the rationale for the choice of cases and controls                                          | 20-24, Extended Data 1-4                       |
|                           |         | (b) For matched studies, give matching criteria and the number of controls per case                                                                                                                          | 20, 23 & Extended Data 1-4                     |
| Variables                 | 7       | Clearly define all outcomes, exposures, predictors, potential confounders, and effect modifiers. Give diagnostic criteria, if applicable                                                                     | 20-24                                          |
| Data sources/measurement  | 8       | For each variable of interest, give sources of data and details of methods of assessment (measurement). Describe comparability of assessment methods if there is more than one group                         | 20-22                                          |
| Bias                      | 9       | Describe any efforts to address potential sources of bias                                                                                                                                                    | 23-24                                          |
| Study size                | 10      | Explain how the study size was arrived at                                                                                                                                                                    | Extended Data 1-4                              |
| Quantitative variables    | 11      | Explain how quantitative variables were handled in the analyses. If applicable, describe which groupings were chosen and why                                                                                 | 23-24                                          |
| Statistical methods       | 12      | (a) Describe all statistical methods, including those used to control for confounding                                                                                                                        | 23-24                                          |
|                           |         | (b) Describe any methods used to examine subgroups and interactions                                                                                                                                          | 23-24                                          |
|                           |         | (c) Explain how missing data were addressed                                                                                                                                                                  | NA, see p. 20                                  |
|                           |         | (d) If applicable, explain how matching of cases and controls was addressed                                                                                                                                  | 20                                             |
|                           |         | (e) Describe any sensitivity analyses                                                                                                                                                                        | 23-24                                          |
| <b>Results</b>            |         |                                                                                                                                                                                                              |                                                |
| Participants              | 13      | (a) Report numbers of individuals at each stage of study—eg numbers potentially eligible, examined for eligibility, confirmed eligible, included in the study, completing follow-up, and analysed            | Extended Data 1-4                              |
|                           |         | (b) Give reasons for non-participation at each stage                                                                                                                                                         | Extended Data 1-4                              |
|                           |         | (c) Consider use of a flow diagram                                                                                                                                                                           | Extended Data 1-4                              |
| Descriptive data          | 14      | (a) Give characteristics of study participants (eg demographic, clinical, social) and information on exposures and potential confounders                                                                     | Table 1 & Supp. Table 2                        |
|                           |         | (b) Indicate number of participants with missing data for each variable of interest                                                                                                                          | NA, see p. 20                                  |
| Outcome data              | 15      | Report numbers in each exposure category, or summary measures of exposure                                                                                                                                    | 3-6, Tables 2-4, & Supp. Tables 1-2            |
| Main results              | 16      | (a) Give unadjusted estimates and, if applicable, confounder-adjusted estimates and their precision (eg, 95% confidence interval). Make clear which confounders were adjusted for and why they were included | 4-7, Tables 2-4, & Supp. Table 1               |
|                           |         | (b) Report category boundaries when continuous variables were categorized                                                                                                                                    | NA                                             |
|                           |         | (c) If relevant, consider translating estimates of relative risk into absolute risk for a meaningful time period                                                                                             | NA                                             |
| Other analyses            | 17      | Report other analyses done—eg analyses of subgroups and interactions, and sensitivity analyses                                                                                                               | 6-7, Table 4, Supp. Table 1, & Extended Data 4 |
| <b>Discussion</b>         |         |                                                                                                                                                                                                              |                                                |
| Key results               | 18      | Summarise key results with reference to study objectives                                                                                                                                                     | 7-9                                            |
| Limitations               | 19      | Discuss limitations of the study, taking into account sources of potential bias or imprecision. Discuss both direction and magnitude of any potential bias                                                   | 9-10                                           |
| Interpretation            | 20      | Give a cautious overall interpretation of results considering objectives, limitations, multiplicity of analyses, results from similar studies, and other relevant evidence                                   | 10                                             |
| Generalisability          | 21      | Discuss the generalisability (external validity) of the study results                                                                                                                                        | 10                                             |
| <b>Other information</b>  |         |                                                                                                                                                                                                              |                                                |
| Funding                   | 22      | Give the source of funding and the role of the funders for the present study and, if applicable, for the original study on which the present article is based                                                | 11                                             |

Abbreviations: NA, not applicable; Supp, Supplementary.
